# Supplementary material for: T follicular helper cells and antibody response to Hepatitis B virus vaccine in HIV-1 infected children receiving ART
Source: PubMed Central journal article supplement (PMC5566956; doi:10.1038/s41598-017-09165-6), 2017-08-21

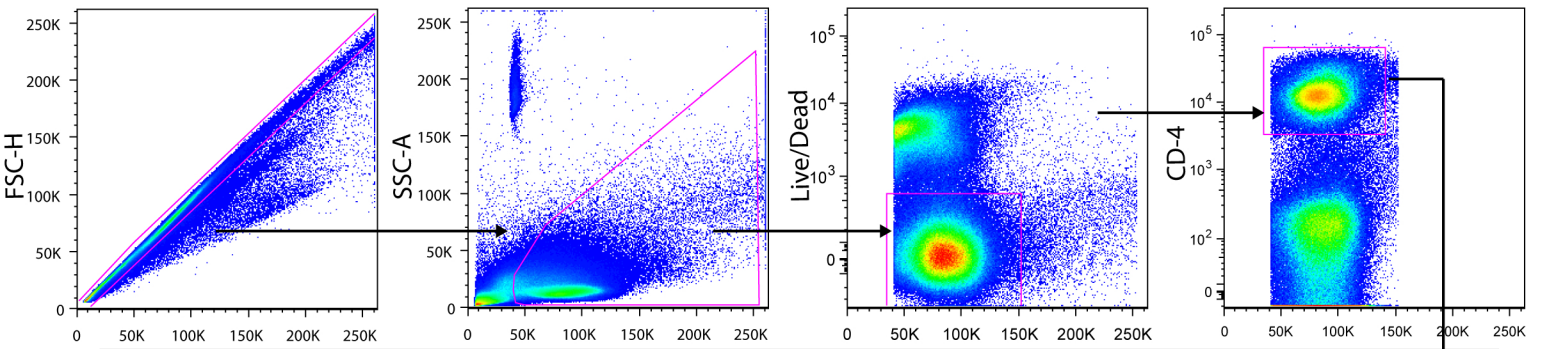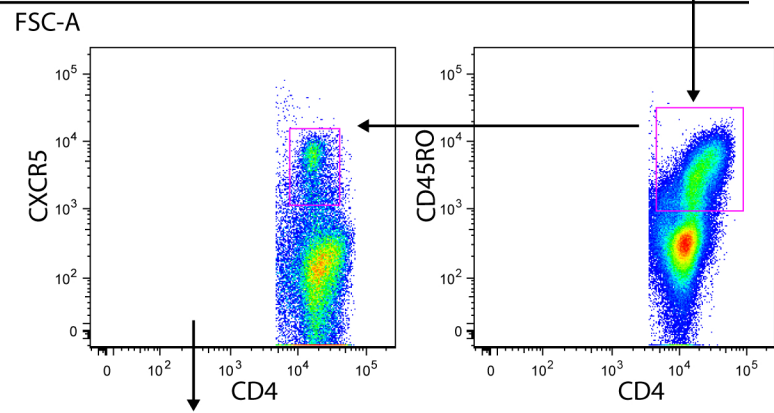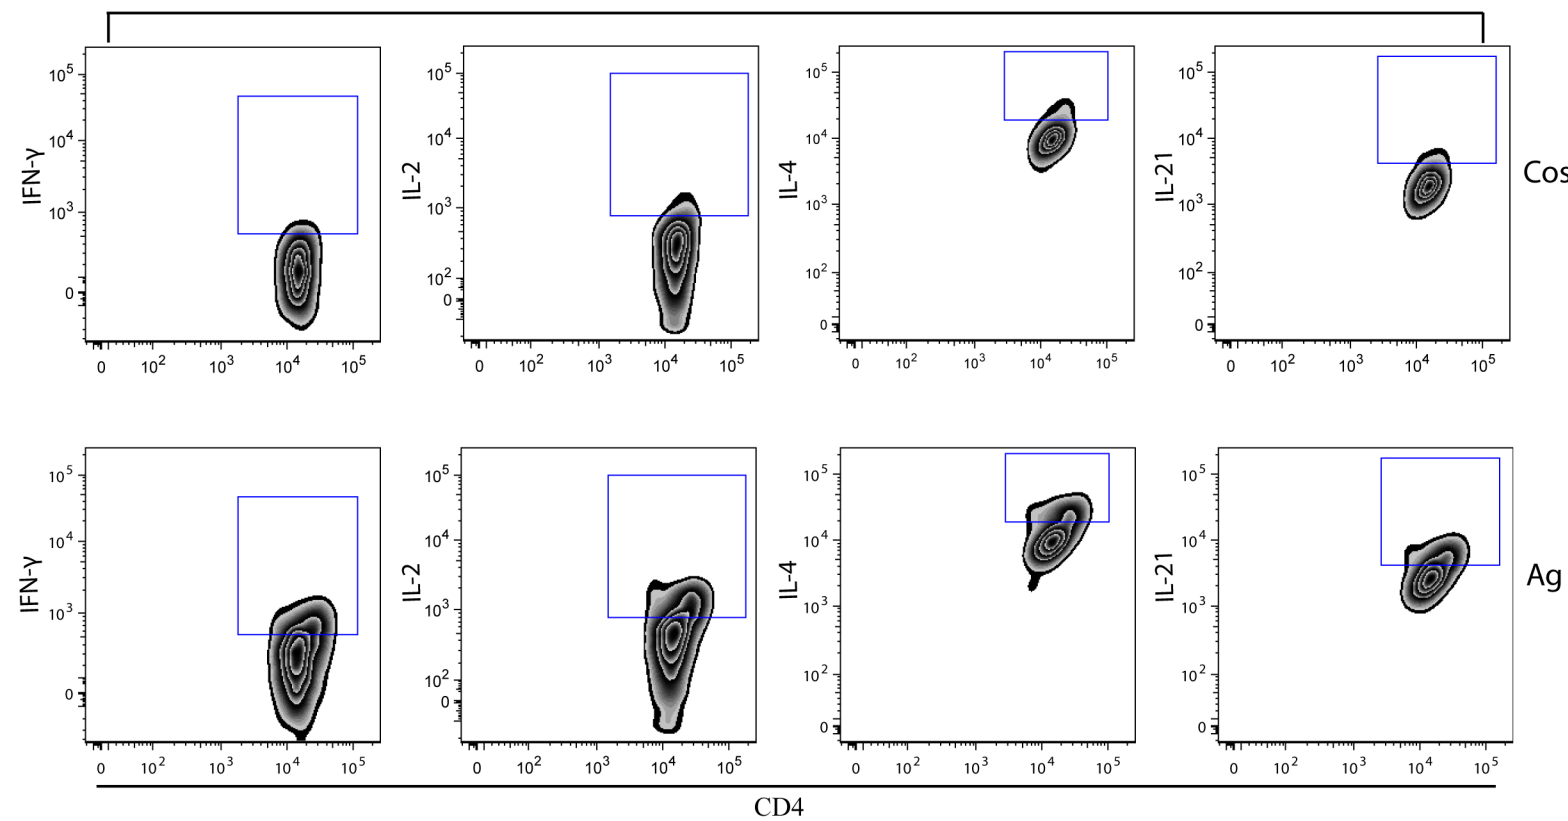

Supplement: 41598_2017_9165_MOESM1_ESM.pdf [file 41598_2017_9165_MOESM1_ESM.pdf]
